# Supplementary material
Source: PubMed Central journal article supplement (PMC5287370)
Supplement: f-73-00009-sup1.pdf [file f-73-00009-sup1.pdf]

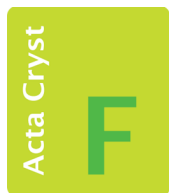

STRUCTURAL BIOLOGY  
COMMUNICATIONS

**Volume 73 (2017)**

**Supporting information for article:**

**Crystal structure of the ATPase-C domain of the chromatin remodeller Fun30 from *Saccharomyces cerevisiae***

**Lan Liu and Tao Jiang**

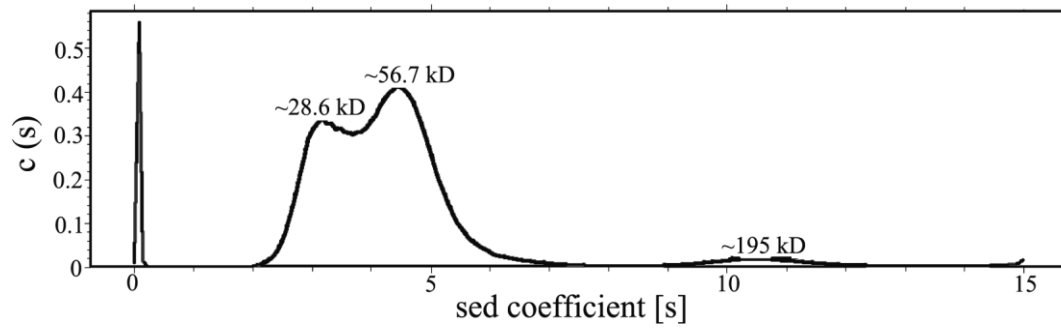

**Figure S1** Analytic ultracentrifugation of Fun30 ATPase-N (residues 572-794) exhibits a mix of monomer and dimer.
